# Supplementary material for: An Anti-inflammatory microRNA Signature Distinguishes Group 3 Innate Lymphoid Cells From Natural Killer Cells in Human Decidua
Source: Front Immunol. 2020 Feb 6;11:133. doi: 10.3389/fimmu.2020.00133 (PMC7015979; doi:10.3389/fimmu.2020.00133)
Supplement: Supplementary file 2 [file Table_2.XLSX]

## Sheet: Foglio1
Supplementary table 2. Differentially expressed miRNAs in dILC3 versus pbNK cells
ID	Transcript ID(Array Design)	Accession	Chromosome	Strand	Fold Change	P-val	FDR P-val
20504298	hsa-miR-574-3p	MIMAT0003239	chr4	+	32.65	9.48e-08	1.01e-05
20500121	hsa-let-7e-5p	MIMAT0000066	chr19	+	10.16	6.6e-05	0.0016
20500765	hsa-miR-125a-5p	MIMAT0000443	chr19	+	10.07	8.63e-05	0.0019
20501176	hsa-miR-99b-5p	MIMAT0000689	chr19	+	7.07	0.0006	0.0072
20520569	hsa-miR-5189-3p	MIMAT0027088	chr16	+	3.03	0.0023	0.0177
20515646	hsa-miR-3201	MIMAT0015086	chr22	+	2.97	0.0423	0.1218
20518881	hsa-miR-4487	MIMAT0019021	chr11	+	2.72	0.0043	0.0267
20518930	hsa-miR-4529-3p	MIMAT0019068	chr18	+	2.33	0.0225	0.0791
20529785	hsa-miR-8075	MIMAT0031002	chr13	+	2.07	0.0151	0.0606
20525426	hsa-miR-6732-5p	MIMAT0027365	chr1	+	2.04	0.0037	0.0241
20502124	hsa-miR-423-3p	MIMAT0001340	chr17	+	-2	0.003	0.0212
20509228	hsa-miR-1910-5p	MIMAT0007884	chr16	-	-2.01	0.0252	0.086
20524034	hsa-miR-6124	MIMAT0024597	chr11	+	-2.04	0.007	0.0362
20529774	hsa-miR-8064	MIMAT0030991	chr3	-	-2.07	0.0453	0.1278
20518946	hsa-miR-4539	MIMAT0019082	chr14	-	-2.09	0.0048	0.0287
20500139	hsa-miR-20a-5p	MIMAT0000075	chr13	+	-2.14	0.0322	0.1009
20500469	hsa-miR-212-3p	MIMAT0000269	chr17	-	-2.17	0.009	0.043
20506009	hsa-miR-939-5p	MIMAT0004982	chr8	-	-2.18	0.0418	0.1208
20519595	hsa-miR-4743-5p	MIMAT0019874	chr18	+	-2.19	0.0146	0.0593
20500174	hsa-miR-93-3p	MIMAT0004509	chr7	-	-2.32	0.0377	0.1128
20525420	hsa-miR-6729-5p	MIMAT0027359	chr1	+	-2.32	1.65e-05	0.0006
20500484	hsa-miR-221-3p	MIMAT0000278	chrX	-	-2.36	0.0186	0.0694
20500488	hsa-miR-223-3p	MIMAT0000280	chrX	+	-2.36	0.026	0.0873
20500715	hsa-let-7i-5p	MIMAT0000415	chr12	+	-2.38	0.0019	0.0155
20525699	hsa-miR-6869-5p	MIMAT0027638	chr20	-	-2.39	1.19e-05	0.0005
20500395	hsa-miR-197-3p	MIMAT0000227	chr1	+	-2.41	0.0421	0.1214
20500128	hsa-miR-16-5p	MIMAT0000069	chr13	-	-2.47	0.0017	0.0147
20525577	hsa-miR-6808-5p	MIMAT0027516	chr1	-	-2.47	0.0021	0.0167
20509237	hsa-miR-1915-3p	MIMAT0007892	chr10	-	-2.49	8.17e-05	0.0018
20500436	hsa-miR-7-1-3p	MIMAT0004553	chr9	-	-2.5	0.0014	0.013
20503794	hsa-miR-146b-3p	MIMAT0004766	chr10	+	-2.56	0.0127	0.0539
20522537	hsa-miR-5787	MIMAT0023252	chr3	+	-2.58	1.36e-06	8.65e-05
20500187	hsa-miR-29b-1-5p	MIMAT0004514	chr7	-	-2.59	0.0035	0.0231
20506896	hsa-miR-664a-5p	MIMAT0005948	chr1	-	-2.6	0.0008	0.0086
20523021	hsa-miR-6089	MIMAT0023714	chrX	+	-2.6	2.18e-05	0.0007
20525383	hsa-miR-6716-5p	MIMAT0025844	chr11	+	-2.6	0.0094	0.044
20519565	hsa-miR-4725-3p	MIMAT0019844	chr17	+	-2.61	0.0302	0.0967
20519650	hsa-miR-4772-3p	MIMAT0019927	chr2	+	-2.61	0.0198	0.0726
20500141	hsa-miR-21-5p	MIMAT0000076	chr17	+	-2.68	0.0241	0.0829
20515585	hsa-miR-3162-5p	MIMAT0015036	chr11	-	-2.68	0.033	0.1024
20519048	hsa-miR-3960	MIMAT0019337	chr9	+	-2.68	2.29e-05	0.0007
20526885	hsa-miR-7162-3p	MIMAT0028235	chr10	-	-2.68	0.0053	0.0307
20500149	hsa-miR-24-2-5p	MIMAT0004497	chr19	-	-2.71	0.0059	0.0328
20523018	hsa-miR-6086	MIMAT0023711	chrX	+	-2.72	0.0018	0.0154
20504583	hsa-miR-766-3p	MIMAT0003888	chrX	-	-2.73	0.0016	0.0144
20503885	hsa-miR-504-3p	MIMAT0026612	chrX	-	-2.74	0.0113	0.0501
20504391	hsa-miR-638	MIMAT0003308	chr19	+	-2.77	1.09e-05	0.0004
20500446	hsa-miR-181b-5p	MIMAT0000257	chr1	-	-2.79	0.0025	0.0187
20519493	hsa-miR-4687-3p	MIMAT0019775	chr11	+	-2.79	2.92e-05	0.0008
20518843	hsa-miR-3135b	MIMAT0018985	chr6	-	-2.81	0.018	0.0679
20523022	hsa-miR-6090	MIMAT0023715	chr11	+	-2.83	1.81e-06	0.0001
20504396	hsa-miR-642a-3p	MIMAT0020924	chr19	+	-2.85	0.024	0.0827
20523019	hsa-miR-6087	MIMAT0023712	chrX	+	-2.85	4.25e-06	0.0002
20519679	hsa-miR-4787-5p	MIMAT0019956	chr3	+	-2.88	7.22e-06	0.0003
20500798	hsa-miR-195-5p	MIMAT0000461	chr17	-	-2.89	0.006	0.0333
20524035	hsa-miR-6125	MIMAT0024598	chr12	+	-2.91	3.43e-05	0.0009
20501157	hsa-miR-106b-5p	MIMAT0000680	chr7	-	-2.92	0.0017	0.0147
20503811	hsa-miR-181d-5p	MIMAT0002821	chr19	+	-2.96	0.0103	0.0471
20525683	hsa-miR-6860	MIMAT0027622	chr11	+	-2.98	0.0009	0.0101
20517919	hsa-miR-3665	MIMAT0018087	chr13	-	-3	2.11e-05	0.0007
20525657	hsa-miR-6848-5p	MIMAT0027596	chr8	-	-3	0.026	0.0873
20519570	hsa-miR-4728-5p	MIMAT0019849	chr17	+	-3.03	0.0055	0.0314
20523007	hsa-miR-6075	MIMAT0023700	chr5	-	-3.12	0.0228	0.08
20501278	hsa-miR-328-3p	MIMAT0000752	chr16	-	-3.14	5.76e-06	0.0003
20503878	hsa-miR-501-3p	MIMAT0004774	chrX	+	-3.14	0.0003	0.004
20506776	hsa-miR-1229-5p	MIMAT0022942	chr5	-	-3.14	0.018	0.0679
20502446	hsa-miR-451a	MIMAT0001631	chr17	-	-3.15	0.0149	0.0603
20525743	hsa-miR-6891-5p	MIMAT0027682	chr6	-	-3.18	0.0073	0.0374
20525565	hsa-miR-6802-5p	MIMAT0027504	chr19	-	-3.22	0.0179	0.0675
20500713	hsa-let-7g-5p	MIMAT0000414	chr3	-	-3.24	0.0003	0.0041
20525497	hsa-miR-6768-5p	MIMAT0027436	chr16	+	-3.26	0.0053	0.0307
20528733	hsa-miR-7704	MIMAT0030019	chr2	+	-3.26	2.43e-07	2.02e-05
20525609	hsa-miR-6824-5p	MIMAT0027548	chr3	-	-3.27	0.0089	0.0429
20503876	hsa-miR-500a-3p	MIMAT0002871	chrX	+	-3.32	0.0005	0.0066
20500159	hsa-miR-28-3p	MIMAT0004502	chr3	+	-3.37	0.0055	0.0315
20529779	hsa-miR-8069	MIMAT0030996	chr21	+	-3.38	6.85e-05	0.0016
20500782	hsa-miR-150-5p	MIMAT0000451	chr19	-	-3.41	0.0002	0.0037
20518818	hsa-miR-4443	MIMAT0018961	chr3	+	-3.43	0.0021	0.0169
20518940	hsa-miR-1587	MIMAT0019077	chrX	+	-3.43	0.0031	0.0216
20525467	hsa-miR-6753-5p	MIMAT0027406	chr11	+	-3.43	0.0027	0.0195
20501279	hsa-miR-342-5p	MIMAT0004694	chr14	+	-3.47	7.1e-05	0.0016
20525573	hsa-miR-6806-5p	MIMAT0027512	chr19	+	-3.47	0.0017	0.0145
20523020	hsa-miR-6088	MIMAT0023713	chr19	+	-3.48	3.57e-06	0.0002
20520568	hsa-miR-5189-5p	MIMAT0021120	chr16	+	-3.61	0.0065	0.0348
20501276	hsa-miR-330-3p	MIMAT0000751	chr19	-	-3.62	0.0156	0.0619
20525517	hsa-miR-6778-5p	MIMAT0027456	chr17	-	-3.68	0.005	0.0293
20500157	hsa-miR-27a-3p	MIMAT0000084	chr19	-	-3.69	0.0042	0.0262
20518834	hsa-miR-4454	MIMAT0018976	chr4	-	-3.72	0.0108	0.0488
20506801	hsa-miR-1207-5p	MIMAT0005871	chr8	+	-3.74	0.0005	0.0067
20529139	hsa-miR-7847-3p	MIMAT0030422	chr11	+	-3.75	3.01e-05	0.0008
20518807	hsa-miR-4433-3p	MIMAT0018949	chr2	+	-3.76	0.001	0.0103
20500795	hsa-miR-193a-5p	MIMAT0004614	chr17	+	-3.77	0.0169	0.0649
20525681	hsa-miR-6769b-5p	MIMAT0027620	chr1	+	-3.79	9.11e-05	0.0019
20500424	hsa-miR-30d-5p	MIMAT0000245	chr8	-	-3.8	0.0002	0.003
20500718	hsa-miR-15b-5p	MIMAT0000417	chr3	+	-3.8	4.73e-05	0.0012
20525448	hsa-miR-6743-5p	MIMAT0027387	chr11	+	-3.95	5.8e-05	0.0014
20525509	hsa-miR-6774-5p	MIMAT0027448	chr16	+	-4.03	0.0118	0.0514
20529137	hsa-miR-7845-5p	MIMAT0030420	chr2	+	-4.05	0.0095	0.0442
20500723	hsa-miR-27b-3p	MIMAT0000419	chr9	+	-4.06	0.0048	0.0287
20500151	hsa-miR-25-3p	MIMAT0000081	chr7	-	-4.07	0.0024	0.0184
20524250	hsa-miR-6165	MIMAT0024782	chr17	+	-4.08	0.001	0.0103
20525511	hsa-miR-6775-5p	MIMAT0027450	chr16	-	-4.09	2.29e-06	0.0001
20500131	hsa-miR-17-3p	MIMAT0000071	chr13	+	-4.22	0.0034	0.0228
20525567	hsa-miR-6803-5p	MIMAT0027506	chr19	-	-4.33	3.6e-07	2.76e-05
20504342	hsa-miR-602	MIMAT0003270	chr9	+	-4.34	0.0213	0.0766
20500137	hsa-miR-19b-3p	MIMAT0000074	chr13	+	-4.35	0.0066	0.0349
20503102	hsa-miR-484	MIMAT0002174	chr16	+	-4.38	0.0013	0.0125
20526182	hsa-miR-7112-5p	MIMAT0028121	chr8	-	-4.38	0.0151	0.0606
20518851	hsa-miR-4466	MIMAT0018993	chr6	-	-4.41	7.82e-07	5.35e-05
20517729	hsa-miR-4270	MIMAT0016900	chr3	-	-4.5	2.07e-05	0.0007
20518905	hsa-miR-4508	MIMAT0019045	chr15	-	-4.51	3.33e-06	0.0002
20500150	hsa-miR-25-5p	MIMAT0004498	chr7	-	-4.54	0.002	0.0161
20506872	hsa-miR-1275	MIMAT0005929	chr6	-	-4.65	7.31e-05	0.0017
20502123	hsa-miR-423-5p	MIMAT0004748	chr17	+	-4.67	0.008	0.0398
20521785	hsa-miR-5100	MIMAT0022259	chr10	+	-4.7	0.0002	0.0034
20517824	hsa-miR-3615	MIMAT0017994	chr17	+	-4.73	0.0024	0.0182
20505608	hsa-miR-675-5p	MIMAT0004284	chr11	-	-4.78	0.0124	0.053
20525416	hsa-miR-6727-5p	MIMAT0027355	chr1	-	-4.81	6.71e-09	1.43e-06
20525533	hsa-miR-6786-5p	MIMAT0027472	chr17	+	-4.83	2.98e-08	4.2e-06
20525561	hsa-miR-6800-5p	MIMAT0027500	chr19	+	-4.91	0.0009	0.0101
20525487	hsa-miR-6763-5p	MIMAT0027426	chr12	+	-4.93	1.73e-05	0.0006
20507742	hsa-miR-1469	MIMAT0007347	chr15	+	-4.94	4.93e-12	1.64e-08
20525677	hsa-miR-6858-5p	MIMAT0027616	chrX	+	-5.12	7.55e-07	5.22e-05
20517907	hsa-miR-3656	MIMAT0018076	chr11	+	-5.32	1.67e-07	1.56e-05
20504569	hsa-miR-1271-5p	MIMAT0005796	chr5	+	-5.34	0.0032	0.0221
20506839	hsa-miR-1247-3p	MIMAT0022721	chr14	-	-5.38	0.0003	0.0044
20520198	hsa-miR-5001-5p	MIMAT0021021	chr2	-	-5.42	2.2e-05	0.0007
20500448	hsa-miR-181c-5p	MIMAT0000258	chr19	+	-5.47	1.55e-09	4.46e-07
20500737	hsa-miR-132-3p	MIMAT0000426	chr17	-	-5.53	0.0446	0.1262
20503908	hsa-miR-532-3p	MIMAT0004780	chrX	+	-5.53	0.0014	0.0132
20500733	hsa-miR-128-3p	MIMAT0000424	chr2	+	-5.56	0.0067	0.0352
20518882	hsa-miR-4488	MIMAT0019022	chr11	+	-5.57	4.2e-08	5.26e-06
20525396	hsa-miR-6724-5p	MIMAT0025856			-5.57	3.23e-08	4.28e-06
20506787	hsa-miR-1237-5p	MIMAT0022946	chr11	+	-5.61	2.44e-10	3.16e-07
20525523	hsa-miR-6781-5p	MIMAT0027462	chr17	-	-5.69	0.0081	0.0401
20500123	hsa-let-7f-5p	MIMAT0000067	chr9	+	-5.82	0.0044	0.0272
20517899	hsa-miR-3648	MIMAT0018068	chr21	+	-5.97	0.0017	0.0147
20500769	hsa-miR-126-3p	MIMAT0000445	chr9	+	-6.11	0.0001	0.0023
20505790	hsa-miR-885-3p	MIMAT0004948	chr3	-	-6.19	0.002	0.0164
20524047	hsa-miR-6127	MIMAT0024610	chr1	-	-6.29	9.56e-06	0.0004
20500781	hsa-miR-149-3p	MIMAT0004609	chr2	+	-6.31	4.67e-08	5.53e-06
20518879	hsa-miR-4485	MIMAT0019019	chr11	-	-6.42	0.008	0.0398
20500385	hsa-miR-192-5p	MIMAT0000222	chr11	-	-6.43	0.0007	0.0084
20518913	hsa-miR-4516	MIMAT0019053	chr16	+	-6.43	4.43e-08	5.34e-06
20526174	hsa-miR-7108-5p	MIMAT0028113	chr19	-	-6.43	5.37e-08	6.25e-06
20524053	hsa-miR-6132	MIMAT0024616	chr7	+	-6.44	0.0004	0.0054
20504552	hsa-miR-671-5p	MIMAT0003880	chr7	+	-6.45	3.6e-09	8.53e-07
20506774	hsa-miR-1228-5p	MIMAT0005582	chr12	+	-6.53	4.37e-08	5.34e-06
20517680	hsa-miR-4298	MIMAT0016852	chr11	-	-6.58	0.0002	0.0035
20519636	hsa-miR-4763-3p	MIMAT0019913	chr22	+	-6.6	4.03e-06	0.0002
20514163	hsa-miR-2861	MIMAT0013802	chr9	+	-6.72	7.56e-06	0.0003
20525543	hsa-miR-6791-5p	MIMAT0027482	chr19	-	-6.84	1.15e-05	0.0005
20525559	hsa-miR-6799-5p	MIMAT0027498	chr19	+	-6.92	6.39e-05	0.0015
20515623	hsa-miR-3187-3p	MIMAT0015069	chr19	+	-6.93	0.0078	0.0393
20515591	hsa-miR-1260b	MIMAT0015041	chr11	+	-6.96	1.63e-05	0.0006
20504586	hsa-miR-762	MIMAT0010313	chr16	+	-7.08	3.45e-07	2.69e-05
20518892	hsa-miR-4497	MIMAT0019032	chr12	+	-7.08	1.06e-09	3.94e-07
20515627	hsa-miR-320e	MIMAT0015072	chr19	-	-7.34	8.98e-06	0.0004
20518432	hsa-miR-3911	MIMAT0018185	chr9	-	-7.36	5.91e-05	0.0014
20500156	hsa-miR-27a-5p	MIMAT0004501	chr19	-	-7.38	1.79e-06	0.0001
20525623	hsa-miR-6831-5p	MIMAT0027562	chr5	-	-7.51	5.7e-06	0.0003
20525601	hsa-miR-6820-5p	MIMAT0027540	chr22	+	-7.55	0.0004	0.0053
20524036	hsa-miR-6126	MIMAT0024599	chr16	-	-7.64	2.31e-05	0.0007
20515638	hsa-miR-3196	MIMAT0015080	chr20	+	-7.8	1.04e-08	1.97e-06
20525571	hsa-miR-6805-5p	MIMAT0027510	chr19	+	-7.85	9.65e-07	6.53e-05
20529568	hsa-miR-7977	MIMAT0031180	chr3	+	-7.96	0.0002	0.0038
20500394	hsa-miR-197-5p	MIMAT0022691	chr1	+	-8.11	2.8e-06	0.0002
20501243	hsa-miR-378a-3p	MIMAT0000732	chr5	+	-8.26	6.16e-05	0.0015
20529782	hsa-miR-8072	MIMAT0030999	chr12	-	-8.29	1.79e-07	1.63e-05
20509224	hsa-miR-1908-5p	MIMAT0007881	chr11	-	-8.33	1.97e-07	1.74e-05
20501299	hsa-miR-339-3p	MIMAT0004702	chr7	-	-8.34	1.04e-06	6.87e-05
20519507	hsa-miR-4695-5p	MIMAT0019788	chr1	-	-8.62	7.53e-06	0.0003
20518839	hsa-miR-4459	MIMAT0018981	chr5	-	-8.75	1.79e-05	0.0006
20500724	hsa-miR-30b-5p	MIMAT0000420	chr8	-	-8.78	0.0041	0.0257
20525599	hsa-miR-6819-5p	MIMAT0027538	chr22	-	-8.78	0.0014	0.0129
20506763	hsa-miR-1225-5p	MIMAT0005572	chr16	-	-8.79	0.0002	0.0031
20519405	hsa-miR-4632-5p	MIMAT0022977	chr1	+	-8.86	0.0001	0.0025
20518801	hsa-miR-4429	MIMAT0018944	chr2	-	-8.94	0.0004	0.0052
20519497	hsa-miR-4689	MIMAT0019778	chr1	-	-8.94	6.64e-05	0.0016
20503880	hsa-miR-502-3p	MIMAT0004775	chrX	+	-9.03	0.0005	0.0066
20500783	hsa-miR-150-3p	MIMAT0004610	chr19	-	-9.07	1.44e-06	9.11e-05
20511549	hsa-miR-2110	MIMAT0010133	chr10	-	-9.22	1.81e-09	4.99e-07
20503793	hsa-miR-146b-5p	MIMAT0002809	chr10	+	-9.27	0.0015	0.0138
20501298	hsa-miR-339-5p	MIMAT0000764	chr7	-	-9.34	1.52e-07	1.46e-05
20519467	hsa-miR-4669	MIMAT0019749	chr9	+	-9.35	1.78e-05	0.0006
20525603	hsa-miR-6821-5p	MIMAT0027542	chr22	+	-9.35	1.4e-05	0.0005
20504295	hsa-miR-572	MIMAT0003237	chr4	+	-9.58	1.37e-05	0.0005
20518629	hsa-miR-3940-5p	MIMAT0019229	chr19	-	-9.63	2.55e-07	2.08e-05
20501182	hsa-miR-30e-5p	MIMAT0000692	chr1	+	-9.67	8.45e-05	0.0018
20517833	hsa-miR-3620-5p	MIMAT0022967	chr1	+	-9.73	6.92e-07	4.88e-05
20519441	hsa-miR-4656	MIMAT0019723	chr7	-	-9.79	9.87e-07	6.61e-05
20519433	hsa-miR-4651	MIMAT0019715	chr7	+	-9.91	3.41e-06	0.0002
20501158	hsa-miR-106b-3p	MIMAT0004672	chr7	-	-10.03	6.91e-05	0.0016
20529799	hsa-miR-8089	MIMAT0031016	chr5	-	-10.11	4.93e-07	3.59e-05
20519494	hsa-miR-1343-5p	MIMAT0027038	chr11	+	-10.13	3.31e-06	0.0002
20515550	hsa-miR-3141	MIMAT0015010	chr5	-	-10.22	7.51e-05	0.0017
20525519	hsa-miR-6779-5p	MIMAT0027458	chr17	+	-10.22	5.38e-05	0.0013
20523017	hsa-miR-6085	MIMAT0023710	chr15	+	-10.24	3.11e-07	2.46e-05
20529773	hsa-miR-8063	MIMAT0030990	chr15	-	-10.45	0.0004	0.0056
20525491	hsa-miR-6765-5p	MIMAT0027430	chr14	-	-10.57	2.84e-09	7.24e-07
20501295	hsa-miR-324-3p	MIMAT0000762	chr17	-	-10.67	0.0008	0.0086
20518826	hsa-miR-4449	MIMAT0018968	chr4	+	-10.87	0.0006	0.0076
20502129	hsa-miR-425-5p	MIMAT0003393	chr3	-	-11.14	3.92e-06	0.0002
20500787	hsa-miR-185-5p	MIMAT0000455	chr22	+	-11.15	9.13e-05	0.0019
20519457	hsa-miR-4665-5p	MIMAT0019739	chr9	+	-11.16	2.37e-05	0.0007
20515617	hsa-miR-3185	MIMAT0015065	chr17	-	-11.2	6.7e-06	0.0003
20518904	hsa-miR-4507	MIMAT0019044	chr14	-	-11.25	2.41e-07	2.02e-05
20525465	hsa-miR-6752-5p	MIMAT0027404	chr11	+	-11.36	2.11e-09	5.6e-07
20504413	hsa-miR-663a	MIMAT0003326	chr20	-	-11.53	7.02e-08	7.89e-06
20500797	hsa-miR-194-5p	MIMAT0000460	chr1	-	-11.54	3.8e-07	2.87e-05
20525539	hsa-miR-6789-5p	MIMAT0027478	chr19	-	-11.56	7.32e-07	5.11e-05
20500132	hsa-miR-18a-5p	MIMAT0000072	chr13	+	-11.66	1.45e-05	0.0005
20529131	hsa-miR-4433b-3p	MIMAT0030414	chr2	-	-11.69	2.9e-07	2.31e-05
20500746	hsa-miR-140-3p	MIMAT0004597	chr16	+	-11.75	0.0007	0.0084
20515520	hsa-miR-3124-5p	MIMAT0014986	chr1	+	-11.77	2.72e-06	0.0002
20519600	hsa-miR-4745-5p	MIMAT0019878	chr19	+	-11.85	1.97e-07	1.74e-05
20519580	hsa-miR-4734	MIMAT0019859	chr17	-	-12.31	3.89e-07	2.9e-05
20525535	hsa-miR-6787-5p	MIMAT0027474	chr17	+	-12.49	2.99e-05	0.0008
20501181	hsa-miR-130b-3p	MIMAT0000691	chr22	+	-12.51	0.0023	0.0177
20517736	hsa-miR-4281	MIMAT0016907	chr5	-	-13.06	0.0001	0.0024
20525593	hsa-miR-6816-5p	MIMAT0027532	chr22	-	-13.35	9.56e-10	3.94e-07
20519525	hsa-miR-4707-5p	MIMAT0019807	chr14	-	-13.48	1.31e-09	3.94e-07
20525549	hsa-miR-6794-5p	MIMAT0027488	chr19	+	-13.53	7.43e-09	1.54e-06
20515624	hsa-miR-3188	MIMAT0015070	chr19	+	-13.78	2.3e-05	0.0007
20525661	hsa-miR-6850-5p	MIMAT0027600	chr8	-	-13.86	1.22e-06	8.01e-05
20503886	hsa-miR-505-5p	MIMAT0004776	chrX	-	-14.05	1.77e-06	0.0001
20525585	hsa-miR-6812-5p	MIMAT0027524	chr20	+	-14.14	1.76e-05	0.0006
20519409	hsa-miR-4634	MIMAT0019691	chr5	+	-14.46	4.95e-05	0.0013
20500164	hsa-miR-31-5p	MIMAT0000089	chr9	-	-14.79	7.2e-05	0.0017
20518625	hsa-miR-3937	MIMAT0018352	chrX	+	-15.01	1.62e-05	0.0006
20500126	hsa-miR-15a-5p	MIMAT0000068	chr13	-	-15.67	3.95e-06	0.0002
20525395	hsa-miR-6723-5p	MIMAT0025855	chr1	-	-15.79	5.54e-06	0.0003
20518893	hsa-miR-4498	MIMAT0019033	chr12	-	-16.32	2.62e-05	0.0008
20519609	hsa-miR-4750-5p	MIMAT0019887	chr19	+	-16.32	9.71e-06	0.0004
20506006	hsa-miR-937-5p	MIMAT0022938	chr8	-	-16.32	3.34e-08	4.35e-06
20526178	hsa-miR-7110-5p	MIMAT0028117	chr3	+	-17.14	1.07e-07	1.11e-05
20501277	hsa-miR-328-5p	MIMAT0026486	chr16	-	-17.9	1.47e-07	1.43e-05
20519429	hsa-miR-4649-5p	MIMAT0019711	chr7	+	-18.25	2.52e-08	3.71e-06
20506865	hsa-miR-1268a	MIMAT0005922	chr15	-	-18.4	1.73e-12	1.14e-08
20504273	hsa-miR-92b-5p	MIMAT0004792	chr1	+	-18.84	4.66e-06	0.0002
20518782	hsa-miR-1268b	MIMAT0018925	chr17	+	-18.93	4.44e-09	1.02e-06
20506901	hsa-miR-1307-3p	MIMAT0005951	chr10	-	-19.19	0.0012	0.0116
20506779	hsa-miR-1231	MIMAT0005586	chr1	+	-19.85	1.25e-07	1.23e-05
20517916	hsa-miR-3663-3p	MIMAT0018085	chr10	-	-20.89	8.49e-09	1.71e-06
20525459	hsa-miR-6749-5p	MIMAT0027398	chr11	-	-20.93	3.21e-08	4.28e-06
20526172	hsa-miR-7107-5p	MIMAT0028111	chr12	-	-21.34	1.21e-09	3.94e-07
20519607	hsa-miR-4749-5p	MIMAT0019885	chr19	+	-21.42	0.0003	0.0051
20519592	hsa-miR-4741	MIMAT0019871	chr18	+	-21.45	8.03e-08	8.73e-06
20518880	hsa-miR-4486	MIMAT0019020	chr11	+	-22.05	6.13e-06	0.0003
20501286	hsa-miR-151a-5p	MIMAT0004697	chr8	-	-22.64	3.14e-08	4.28e-06
20500758	hsa-miR-152-3p	MIMAT0000438	chr17	-	-23.13	8.95e-06	0.0004
20506781	hsa-miR-1233-5p	MIMAT0022943	chr15	-	-23.25	1.34e-06	8.65e-05
20523000	hsa-miR-6068	MIMAT0023693	chr1	-	-24.02	6.8e-08	7.77e-06
20519474	hsa-miR-4674	MIMAT0019756	chr9	-	-24.32	5.76e-09	1.27e-06
20500158	hsa-miR-28-5p	MIMAT0000085	chr3	+	-26.57	0.0001	0.0023
20519498	hsa-miR-4690-5p	MIMAT0019779	chr11	+	-26.96	1.62e-06	0.0001
20509227	hsa-miR-1909-3p	MIMAT0007883	chr19	-	-27.95	1.2e-08	2.16e-06
20525557	hsa-miR-6798-5p	MIMAT0027496	chr19	+	-28.2	2.05e-07	1.79e-05
20525541	hsa-miR-6790-5p	MIMAT0027480	chr19	-	-30.52	2.62e-07	2.12e-05
20518845	hsa-miR-4463	MIMAT0018987	chr6	+	-31.13	4.45e-05	0.0012
20500144	hsa-miR-22-3p	MIMAT0000077	chr17	-	-31.99	2.25e-07	1.91e-05
20501206	hsa-miR-363-3p	MIMAT0000707	chrX	-	-32.3	3.69e-05	0.001
20518933	hsa-miR-4532	MIMAT0019071	chr20	+	-33.1	5.17e-11	8.58e-08
20515610	hsa-miR-3180-3p	MIMAT0015058	chr16	+	-34.48	1.77e-07	1.63e-05
20519589	hsa-miR-4739	MIMAT0019868	chr17	-	-35.04	1.27e-06	8.23e-05
20518901	hsa-miR-4505	MIMAT0019041	chr14	+	-35.16	0.0003	0.0044
20519626	hsa-miR-4758-5p	MIMAT0019903	chr20	-	-35.68	8.98e-10	3.94e-07
20515637	hsa-miR-3195	MIMAT0015079	chr20	+	-36.05	1.19e-05	0.0005
20518425	hsa-miR-3180	MIMAT0018178	chr16	-	-36.09	4.43e-05	0.0012
20525394	hsa-miR-6722-3p	MIMAT0025854	chr9	-	-40.99	2.58e-11	5.7e-08
20503105	hsa-miR-486-5p	MIMAT0002177	chr8	-	-41.91	7.43e-08	8.21e-06
20525503	hsa-miR-6771-5p	MIMAT0027442	chr16	+	-42.65	1.07e-08	1.97e-06
20506771	hsa-miR-1227-5p	MIMAT0022941	chr19	-	-42.71	3.47e-08	4.43e-06
20518852	hsa-miR-4467	MIMAT0018994	chr7	+	-45.02	2.19e-06	0.0001
20518887	hsa-miR-4492	MIMAT0019027	chr11	+	-51	1.2e-07	1.2e-05
20515607	hsa-miR-3178	MIMAT0015055	chr16	-	-54.25	3.16e-09	7.75e-07
20517835	hsa-miR-3621	MIMAT0018002	chr9	-	-57.37	1.52e-08	2.66e-06
20500161	hsa-miR-29a-3p	MIMAT0000086	chr7	-	-57.53	2.39e-06	0.0001
20500445	hsa-miR-181a-2-3p	MIMAT0004558	chr9	+	-66.28	1.83e-05	0.0006
